# Supplementary material for: Synthesis and Properties of Modified Biodegradable Polymers Based on Caprolactone
Source: MDPI journal article supplement (doi:10.3390/polym15244731), 2023-12-17
Supplement: s1 [file s1]

## Supplementary Materials

# Synthesis and Properties of Modified Biodegradable Polymers Based on Caprolactone

Maria E. Fortună <sup>1</sup>, Elena Ungureanu <sup>2,\*</sup>, Răzvan Rotaru <sup>1</sup>, Alexandra Bargan <sup>1</sup>, Ovidiu C. Ungureanu <sup>3</sup>, Carmen O. Brezuleanu <sup>2</sup> and Valeria Harabagiu <sup>1</sup>

<sup>1</sup> Institute of Macromolecular Chemistry “Petru Poni”, 41A Grigore Ghica Voda Alley, 700487 Iasi, Romania; fortuna.maria@icmpp.ro (M.E.F.); rotaru.razvan@icmpp.ro (R.R.); anistor@icmpp.ro (A.B.); hvaleria@icmpp.ro (V.H.)

<sup>2</sup> “Ion Ionescu de la Brad” Iasi University of Life Sciences, 3 Mihail Sadoveanu Alley, 700490 Iasi, Romania; olgutabrez@uaiaasi.ro

<sup>3</sup> “Vasile Goldis” Western University of Arad, 94 the Boulevard of the Revolution, 310025 Arad, Romania; ungureanu.ovidiu@uvvg.ro

\* Correspondence: eungureanu@uaiaasi.ro

### S1. Preparation of the aminopropyl-terminated polydimethylsiloxane-poly( $\epsilon$ -caprolactone) copolymers: PDMS-PCL-1 and PDMS-PCL-2

The copolymers were synthesized via the ring-opening polymerization of poly- $\epsilon$ -caprolactone (PCL) in the presence of aminopropyl-terminated polydimethylsiloxane (APDMS) with  $\text{Sn}(\text{Oct})_2$  as the catalyst, as shown in Scheme 1.

Thus,  $\epsilon$ -caprolactone (3 g), aminopropyl terminated polydimethylsiloxane (1.6 g), stannous octoate catalyst (0.023 g), and 10 g of xylene were added to a 50 mL three-neck flask at 120 °C and stirred under nitrogen for 24 h when the copolymers were synthesized. The purification of the copolymers was performed by precipitating the reaction mixture in methanol. The precipitated products obtained were dried in a vacuum drying oven at 30–40 °C.

The aminopropyl-terminated polydimethylsiloxane-poly( $\epsilon$ -caprolactone) copolymers (PDMS-PCL) were obtained.

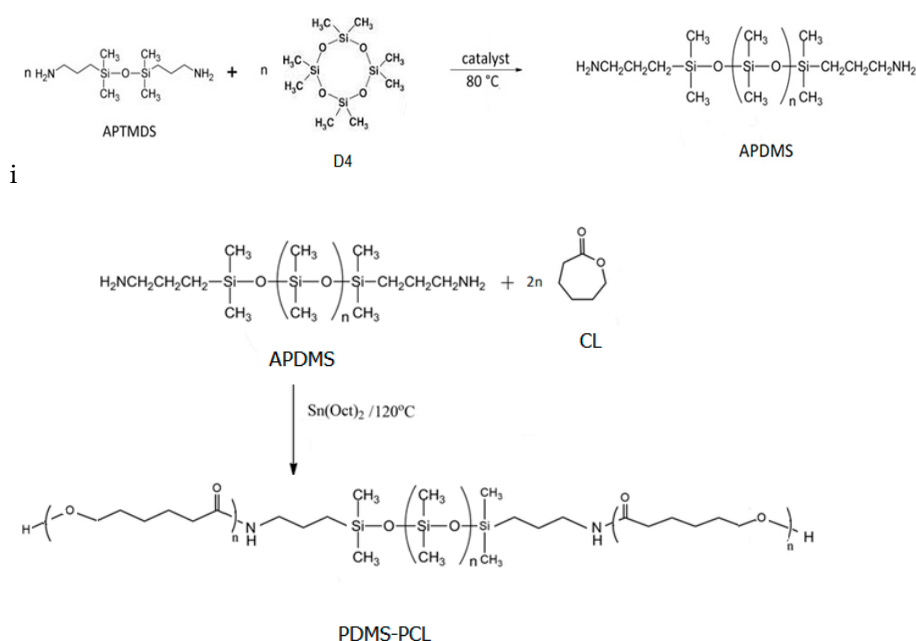

**Scheme S1.** PDMS-PCL copolymers synthesis.

## S2. NMR spectra for PDMS-PCL-1 and PDMS-PCL-2 copolymers

The synthesis of the well-defined copolymer was confirmed by the NMR spectra (Figure S1).

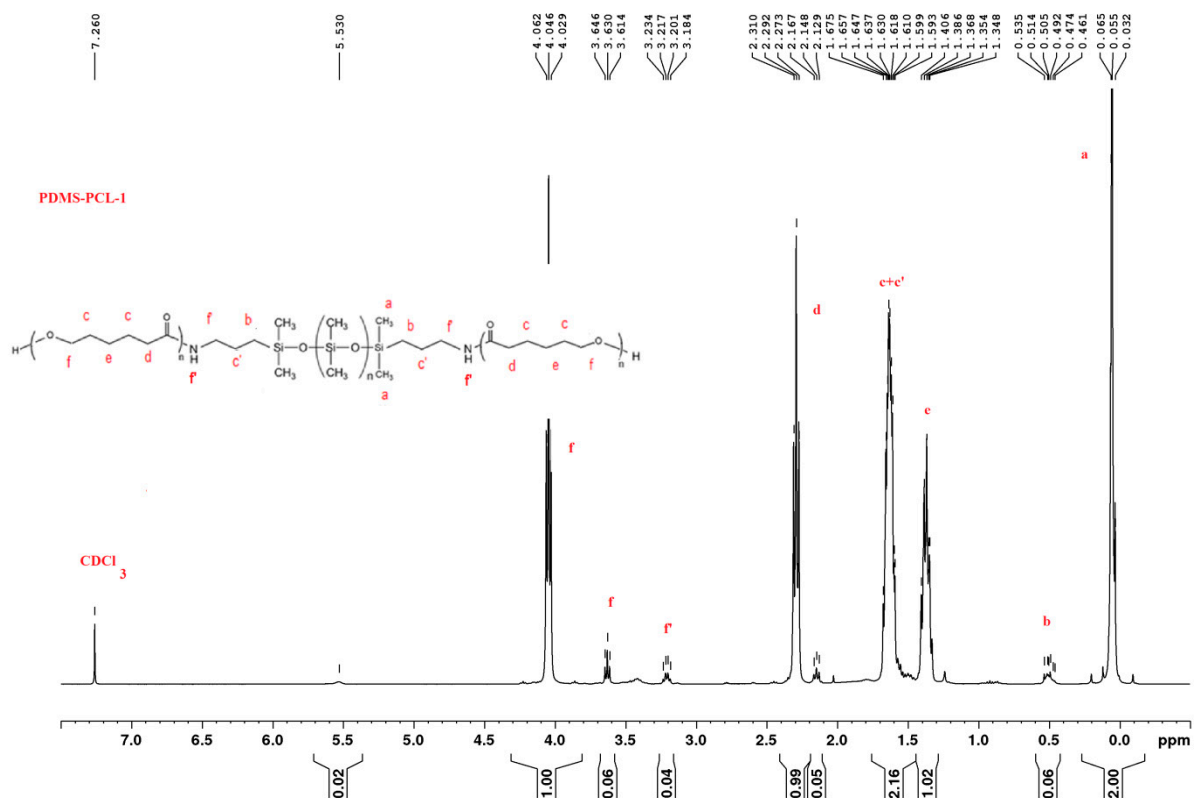

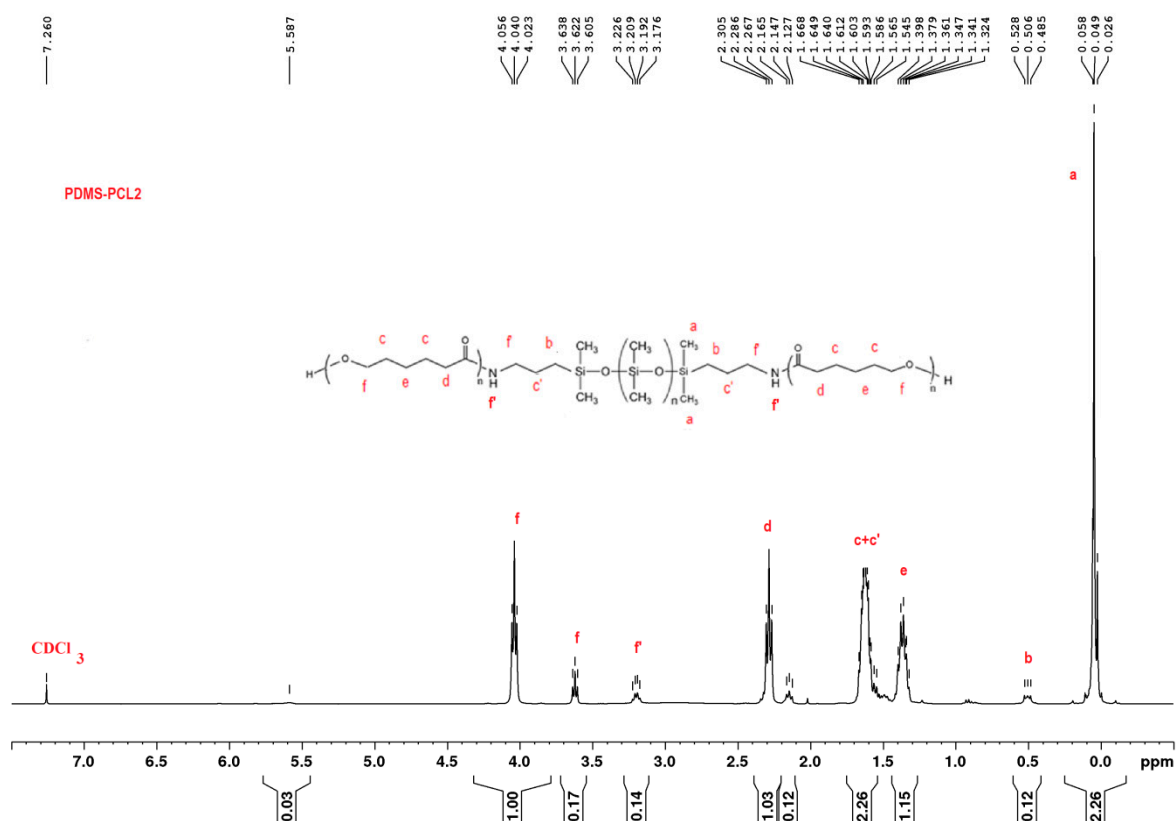

**Figure S1.** NMR spectra for PDMS-PCL-1 and PDMS-PCL-2 copolymers.

–CH<sub>2</sub>–CH<sub>2</sub>–CH<sub>2</sub>–NH– (1.61 ppm); –CO–CH<sub>2</sub>–CH<sub>2</sub>–CH<sub>2</sub>– (1.40 ppm); –CO–CH<sub>2</sub>–CH<sub>2</sub>– (1.60 ppm); –CO–CH<sub>2</sub>– (2.31 ppm); –Si(CH<sub>3</sub>)<sub>2</sub>– (0.07 ppm); –Si–CH<sub>2</sub>– (0.5 ppm); and –CH<sub>2</sub>–CH<sub>2</sub>–CH<sub>2</sub>– (1.47); –NH– (3.2); –CH<sub>2</sub>–H (3.6 ppm); –CH<sub>2</sub>–NH– (4.05 ppm).

**Table S1.** The total chlorophyll content in the leaves of tomato plants 35 days after planting.

| Samples | Chlorophyll content index, 1 CCI |         |         |            |            |     |
|---------|----------------------------------|---------|---------|------------|------------|-----|
|         | Reference                        | APDMS-1 | APDMS-2 | PDMS-PCL-1 | PDMS-PCL-2 | PCL |
| 10.4    | 10.4                             | 7.2     | 7.4     | 8.7        | 8.8        | 9.9 |
| 10.4    | 10.4                             | 7.1     | 7.5     | 8.6        | 8.9        | 9.9 |
| 10.3    | 10.3                             | 7.3     | 7.4     | 8.8        | 8.7        | 9.9 |
| 10.5    | 10.5                             | 7.2     | 7.3     | 8.7        | 8.8        | 9.9 |
